# Supplementary material
Source: PubMed Central journal article supplement (PMC7002022)
Supplement: NIHMS1548329-supplement-125_2019_5066_MOESM1_ESM.pdf [file NIHMS1548329-supplement-125_2019_5066_MOESM1_ESM.pdf]

## **Electronic supplementary material (ESM)**

### **Hyaluronan deposition in islets may precede and direct the location of islet immune cell infiltrates**

Marika Bogdani, Cate Speake, Mathew J. Dufort, Pamela Y. Johnson, Megan J. Larmore, Anthony J. Day,  
Thomas N. Wight, Åke Lernmark, Carla J. Greenbaum

ESM Table 1. Clinical and morphologic characteristics of study cases

| Donor                        | Donor ID | Autoantibody                         | Age           | Gender       | Ethnicity        | C-peptide (ng/ml) | BMI                      | DRB1_1 | DRB1_2 | DQA1_1 | DQA1_2 | DQB1_1 | DQB1_2 | RISK (genotype) | RISK (haplotypes) | Family history for diabetes               | Cause of death          | Donor group                            | Islet HA+ area (µm <sup>2</sup> ) | Beta cell mass (mg) |
|------------------------------|----------|--------------------------------------|---------------|--------------|------------------|-------------------|--------------------------|--------|--------|--------|--------|--------|--------|-----------------|-------------------|-------------------------------------------|-------------------------|----------------------------------------|-----------------------------------|---------------------|
| <b>Autoantibody-positive</b> |          |                                      |               |              |                  |                   |                          |        |        |        |        |        |        |                 |                   |                                           |                         |                                        |                                   |                     |
| 1                            | 6267     | GADA <sup>+</sup> IA-2A <sup>+</sup> | 23            | Female       | Caucasian        | 16.6              | 24                       | 0401   | 0404   | 0301   | 0301   | 0302   | 0302   | S               | S / S             | nr                                        | Anoxia                  | HA <sup>high</sup> LCA <sup>high</sup> | 2450                              | 470                 |
| 2                            | 6167     | IA2A <sup>+</sup> ZnT8A <sup>+</sup> | 37            | Male         | Caucasian        | 5.4               | 26                       | 0404   | 1502   | 0103   | 0301   | 0302   | 0601   | S               | S / N             | nr                                        | Head trauma             | HA <sup>low</sup> LCA <sup>high</sup>  | 1000                              | 1100                |
| 3                            | 6158     | GADA <sup>+</sup> mIAA <sup>+</sup>  | 40            | Male         | Caucasian        | 0.5               | 30                       | 0401   | 1302   | 0102   | 0301   | 0301   | 0604   | P               | P / N             | Father with T2D                           | Head trauma             | HA <sup>high</sup> LCA <sup>high</sup> | 900                               | 1160                |
| 4                            | 6154     | GADA <sup>+</sup>                    | 49            | Female       | Caucasian        | 0.1               | 25                       | 0901   | 1501   | 0102   | 0301   | 0303   | 0603   | P               | N / P             | nr                                        | Head trauma             | HA <sup>high</sup>                     | 800                               | 610                 |
| 5                            | 6310     | GADA <sup>+</sup>                    | 28            | Female       | Hispanic         | 10.5              | 24                       | 0701   | 1102   | 0201   | 0501   | 0202   | 0319   | N               | N / N             | nr                                        | Anoxia                  | HA <sup>high</sup>                     | 680                               | 450                 |
| 6                            | 6197     | GADA <sup>+</sup> IA-2A <sup>+</sup> | 22            | Male         | African-American | 17.5              | 28                       | 0302   | 0701   | 0201   | 0401   | 0202   | 0402   | P               | P / P             | Yes, unspecified                          | Head trauma             | HA <sup>high</sup>                     | 660                               | 1230                |
| 7                            | 6151     | GADA <sup>+</sup>                    | 30            | Male         | Caucasian        | 5.5               | 24                       | 0101   | 0701   | 0101   | 0201   | 0202   | 0501   | N               | N / N             | nr                                        | Anoxia                  | HA <sup>high</sup>                     | 600                               | 240                 |
| 8                            | 6080     | GADA <sup>+</sup> mIAA <sup>+</sup>  | 69            | Female       | Caucasian        | 1.84              | 21                       | 0101   | 0401   | 0101   | 0301   | 0301   | 0501   | P               | N / P             | nr                                        | Cerebrovascular/ stroke | HA <sup>low</sup>                      | 380                               | 910                 |
| 9                            | 6027     | ZnT8 <sup>+</sup>                    | 19            | Male         | Caucasian        | nd                | 20                       | 0301   | 1501   | 0102   | 0501   | 0201   | 0602   | P               | S / P             | nr                                        | nr                      | HA <sup>low</sup>                      | 250                               | 790                 |
| 10                           | 6171     | GADA <sup>+</sup>                    | 4             | Female       | Caucasian        | 9.0               | 15                       | 0301   | 0301   | 0501   | 0501   | 0201   | 0201   | S               | S / S             | nr                                        | Anoxia                  | HA <sup>low</sup>                      | 250                               | N/D                 |
| 11                           | 6303     | GADA <sup>+</sup>                    | 22            | Male         | Caucasian        | 3.0               | 32                       | 0301   | 0701   | 0201   | 0501   | 0201   | 0202   | S               | S / N             | Sister with juvenile T1D, father with T2D | Head trauma             | HA <sup>low</sup>                      | 220                               | 850                 |
| 12                           | 6181     | GADA <sup>+</sup>                    | 32            | Male         | Caucasian        | 0.6               | 22                       | 0101   | 0401   | 0101   | 0301   | 0302   | 0501   | S               | N / S             | nr                                        | Head trauma             | HA <sup>low</sup>                      | 200                               | 690                 |
| 13                           | 6123     | GADA <sup>+</sup>                    | 23            | Female       | Caucasian        | 2.0               | 18                       | 0801   | 1101   | 0401   | 0501   | 0301   | 0402   | N               | N / P             | nr                                        | Head trauma             | HA <sup>low</sup>                      | 200                               | 510                 |
| 14                           | 6301     | GADA <sup>+</sup>                    | 26            | Male         | African-American | 3.9               | 32                       | 1101   | 1304   | 0102   | 0501   | 0319   | 0602   | P               | P / P             | nr                                        | Head trauma             | HA <sup>low</sup>                      | 140                               | 580                 |
| 15                           | 6314     | GADA <sup>+</sup>                    | 21            | Male         | Caucasian        | 1.5               | 24                       | 0103   | 0401   | 0101   | 0501   | 0301   | 0501   | P               | N / P             | Yes, unspecified                          | Head trauma             | HA <sup>low</sup>                      | 140                               | 730                 |
| Average                      |          |                                      | 30 ± 15 years | Females, 40% |                  | 6 ± 6             | 24 ± 6 kg/m <sup>2</sup> |        |        |        |        |        |        |                 |                   |                                           |                         |                                        |                                   |                     |
| <b>Autoantibody-negative</b> |          |                                      |               |              |                  |                   |                          |        |        |        |        |        |        |                 |                   |                                           |                         |                                        |                                   |                     |
| 16                           | 6055     | Negative                             | 27            | Male         | Caucasian        | 0.6               | 23                       | 0103   | 0103   | 0501   | 0501   | 0301   | 0301   | P               | P / P             | nr                                        | Anoxia                  |                                        | 180                               | 1350                |
| 17                           | 6104     | Negative                             | 41            | Male         | Caucasian        | 20.6              | 21                       | 0701   | 1301   | 0101   | 0201   | 0201   | 0501   | N               | N / N             | nr                                        | Anoxia                  |                                        | 350                               | 450                 |
| 18                           | 6179     | Negative                             | 20            | Female       | Caucasian        | 2.7               | 21                       | 0301   | 0404   | 0301   | 0501   | 0201   | 0302   | S               | S / S             | nr                                        | Head trauma             |                                        | 220                               | 660                 |
| 19                           | 6233     | Negative                             | 14            | Male         | Caucasian        | 7.3               | 22                       | 0101   | 1301   | 0101   | 0103   | 0501   | 0603   | P               | N / P             | Mother and sister with T1D                | Anoxia                  |                                        | 330                               | 1180                |
| 20                           | 6129     | Negative                             | 43            | Female       | Caucasian        | 0.5               | 23                       | 0301   | 1501   | 0102   | 0501   | 0201   | 0602   | P               | P / P             | nr                                        | Anoxia                  |                                        | 230                               | 690                 |
| 21                           | 6013     | Negative                             | 65            | Male         | Caucasian        | 2.8               | 24                       | 0102   | 1301   | 0101   | 0103   | 0501   | 0603   | N               | N / P             | nr                                        | Cerebrovascular/ stroke |                                        | 370                               | N/D                 |
| 22                           | 6230     | Negative                             | 16            | Male         | Caucasian        | 5.2               | 19                       | 0401   | 1101   | 0301   | 0501   | 0301   | 0302   | S               | S / P             | nr                                        | Head trauma             |                                        | 190                               | 800                 |
| 23                           | 6174     | Negative                             | 21            | Male         | Caucasian        | 3.0               | 20                       | 0301   | 0701   | 0201   | 0501   | 0201   | 0201   | S               | S / N             | nr                                        | Cerebrovascular/ stroke |                                        | 340                               | 860                 |
| 24                           | 6232     | Negative                             | 14            | Female       | Caucasian        | 19.5              | 21                       | 1501   | 1501   | 0102   | 0102   | 0602   | 0602   | P               | P / P             | nr                                        | Head trauma             |                                        | 180                               | 460                 |
| 25                           | 6295     | Negative                             | 47            | Female       | African-American | 10.9              | 30                       | 0301   | 1501   | 0102   | 0501   | 0201   | 0602   | P               | S / P             | nr                                        | Head trauma             |                                        | 220                               | 390                 |
| 26                           | 6005     | Negative                             | 5             | Female       | Caucasian        | nd                | nd                       | 0101   | 1201   | 0101   | 0501   | 0301   | 0501   | N               | N / N             | nr                                        | Cerebrovascular/ stroke |                                        | 170                               | N/D                 |
| 27                           | 6134     | Negative                             | 27            | Male         | Caucasian        | 3.6               | 20                       | 0701   | 1001   | 0101   | 0201   | 0201   | 0501   | N               | N / N             | nr                                        | Anoxia                  |                                        | 290                               | 910                 |
| 28                           | 6160     | Negative                             | 22            | Male         | Caucasian        | 0.4               | 24                       | nd     |        |        |        |        |        |                 |                   | nr                                        | Head trauma             |                                        | 260                               | 1070                |
| 29                           | 6098     | Negative                             | 18            | Male         | Caucasian        | 1.4               | 23                       | 0301   | 0801   | 0401   | 0501   | 0201   | 0402   | S               | S / N             | nr                                        | Head trauma             |                                        | 170                               | 1200                |
| Average                      |          |                                      | 27 ± 16 years | Females, 30% |                  | 6 ± 7             | 22 ± 3 kg/m <sup>2</sup> |        |        |        |        |        |        |                 |                   |                                           |                         |                                        |                                   |                     |

nr, not reported  
 nd, not determined  
 P, protective; N, neutral; S, susceptible

- Note 1. The case numbers indicate the tissues from autoantibody-positive and autoantibody-negative donors, which are ranked according to the size of their islet HA-positive areas, with 1 and 16 having the most HA in their respective groups.  
 Note 2. Numbers 1 - 7 are the aAb<sup>high</sup>HA<sup>high</sup> cases; numbers 8-15 are the aAb+HA<sup>low</sup> cases.  
 Note 3. C-peptide levels are in ng/ml.

**ESM Table 2. Antibodies used for immunohistochemistry.**

| Antigen                         | Antibody supplier                                        | Catalog number | Dilution                              |
|---------------------------------|----------------------------------------------------------|----------------|---------------------------------------|
| <b>Primary antibodies</b>       |                                                          |                |                                       |
| Insulin                         | Abcam, Cambridge, MA, USA                                | ab7842         | 1:1000                                |
| Synaptophysin                   | Thermo Fisher, Waltham, MA, USA                          | MA5-11575      | 1:100                                 |
| Ki67                            | Abcam, Cambridge, MA, USA                                | ab15580        | 1:100                                 |
| CD3                             | DAKO, Carpinteria, CA, USA                               | A0452          | 1:100                                 |
| CD11c                           | Abcam, Cambridge, MA, USA                                | ab52632        | 1:50                                  |
| CD20                            | DAKO, Carpinteria, CA, USA                               | M0755          | 1:50                                  |
| CD68                            | DAKO, Carpinteria, CA, USA                               | M0814          | 1:100                                 |
| LCA                             | Abcam, Cambridge, MA, USA                                | ab187271       | 1:200                                 |
| LCA (clone OX-1)                | Bio-Rad, Hercules, CA, USA                               | MCA43          | 1:100                                 |
| CD68 (clone ED1)                | Bio-Rad, Hercules, CA, USA                               | MCA341         | 1:100                                 |
| <b>Secondary antibodies</b>     |                                                          |                |                                       |
| anti-guinea pig IgG             | Jackson ImmunoResearch laboratories, West Grove, PA, USA | 706-065-148    | 1:500                                 |
| anti-mouse IgG                  | Biocare Medical, Pacheco, CA, USA                        | M4U534         | as indicated in the product datasheet |
| anti-rabbit IgG                 | Biocare Medical, Pacheco, CA, USA                        | M4U534         | as indicated in the product datasheet |
| <b>Antibody dilution buffer</b> |                                                          |                |                                       |
| Phosphate buffer saline (PBS)   | Thermo Fisher, Waltham, MA, USA                          | 10010023       | N/A                                   |

ESM Table 3. Insulitis grade, islet HA areas, and beta cell mass in BB rats.

| Genotype  | Age (weeks) | n | Percent islets with insulitis grade |    |    |    | Overall Insulitis grade | Islet HA area ( $\mu\text{m}^2$ ) | Beta cell mass ( $\mu\text{g}$ ) |
|-----------|-------------|---|-------------------------------------|----|----|----|-------------------------|-----------------------------------|----------------------------------|
|           |             |   | 0                                   | 1  | 2  | 3  |                         |                                   |                                  |
| DRLyp/+   | 7           |   | 100                                 | 0  | 0  | 0  | 0                       | 960                               | 1520                             |
|           | 7           |   | 100                                 | 0  | 0  | 0  | 0                       | 1140                              | 2380                             |
|           | 7           |   | 100                                 | 0  | 0  | 0  | 0                       | 1070                              | 2520                             |
|           | 7           |   | 100                                 | 0  | 0  | 0  | 0                       | 910                               | 1420                             |
|           | 8           |   | 100                                 | 0  | 0  | 0  | 0                       | 1030                              | 2100                             |
|           | 8           |   | 100                                 | 0  | 0  | 0  | 0                       | 930                               | 2700                             |
|           | 7-8         | 6 | 100                                 | 0  | 0  | 0  | 0                       | 1010                              | 2110                             |
| DRLyp/Lyp | 7           |   | 100                                 | 0  | 0  | 0  | 0                       | 1400                              | 2080                             |
|           | 7           |   | 100                                 | 0  | 0  | 0  | 0                       | 2250                              | 2650                             |
|           | 7           |   | 100                                 | 0  | 0  | 0  | 0                       | 3860                              | 1100                             |
|           | 7           |   | 100                                 | 0  | 0  | 0  | 0                       | 1790                              | 2010                             |
|           | 8           |   | 100                                 | 0  | 0  | 0  | 0                       | 2540                              | 1800                             |
|           | 8           |   | 100                                 | 0  | 0  | 0  | 0                       | 2380                              | 1910                             |
|           | 7-8         | 6 | 100                                 | 0  | 0  | 0  | 0                       | 2370                              | 1930                             |
| DRLyp/Lyp | 9           |   | 21                                  | 69 | 8  | 2  | 1                       | 4190                              | 950                              |
|           | 9           |   | 25                                  | 67 | 8  | 0  | 1                       | 3730                              | 1180                             |
|           | 9           |   | 26                                  | 72 | 2  | 0  | 1                       | 4610                              | 780                              |
|           | 9           |   | 26                                  | 63 | 10 | 1  | 1                       | 4490                              | 750                              |
|           | 10          |   | 16                                  | 73 | 11 | 0  | 1                       | 7950                              | 840                              |
|           | 10          |   | 25                                  | 68 | 6  | 1  | 1                       | 4900                              | 1120                             |
|           | 9-10        | 6 | 23                                  | 69 | 8  | 1  | 1                       | 4980                              | 940                              |
| DRLyp/Lyp | 10          |   | 4                                   | 9  | 79 | 8  | 2                       | 9040                              | 470                              |
|           | 11          |   | 8                                   | 28 | 50 | 14 | 2                       | 5280                              | 550                              |
|           | 11          |   | 13                                  | 5  | 66 | 16 | 2                       | 9640                              | 610                              |
|           | 11          |   | 3                                   | 25 | 62 | 10 | 2                       | 6270                              | 1050                             |
|           | 11          |   | 12                                  | 15 | 61 | 12 | 2                       | 5890                              | 1090                             |
|           | 10-11       | 5 | 8                                   | 16 | 64 | 12 | 2                       | 7220                              | 750                              |
| DRLyp/Lyp | 11          |   | 1                                   | 1  | 29 | 69 | 3                       | 5620                              | 130                              |
|           | 11          |   | 5                                   | 3  | 2  | 90 | 3                       | 3320                              | 230                              |
|           | 12          |   | 6                                   | 2  | 7  | 93 | 3                       | 4620                              | 170                              |
|           | 12          |   | 0                                   | 1  | 19 | 80 | 3                       | 4100                              | 490                              |
|           | 12          |   | 2                                   | 0  | 28 | 70 | 3                       | 8120                              | 260                              |
|           | 12          |   | 8                                   | 2  | 10 | 80 | 3                       | 6550                              | 630                              |
|           | 11-12       | 6 | 4                                   | 2  | 16 | 80 | 3                       | 5390                              | 320                              |

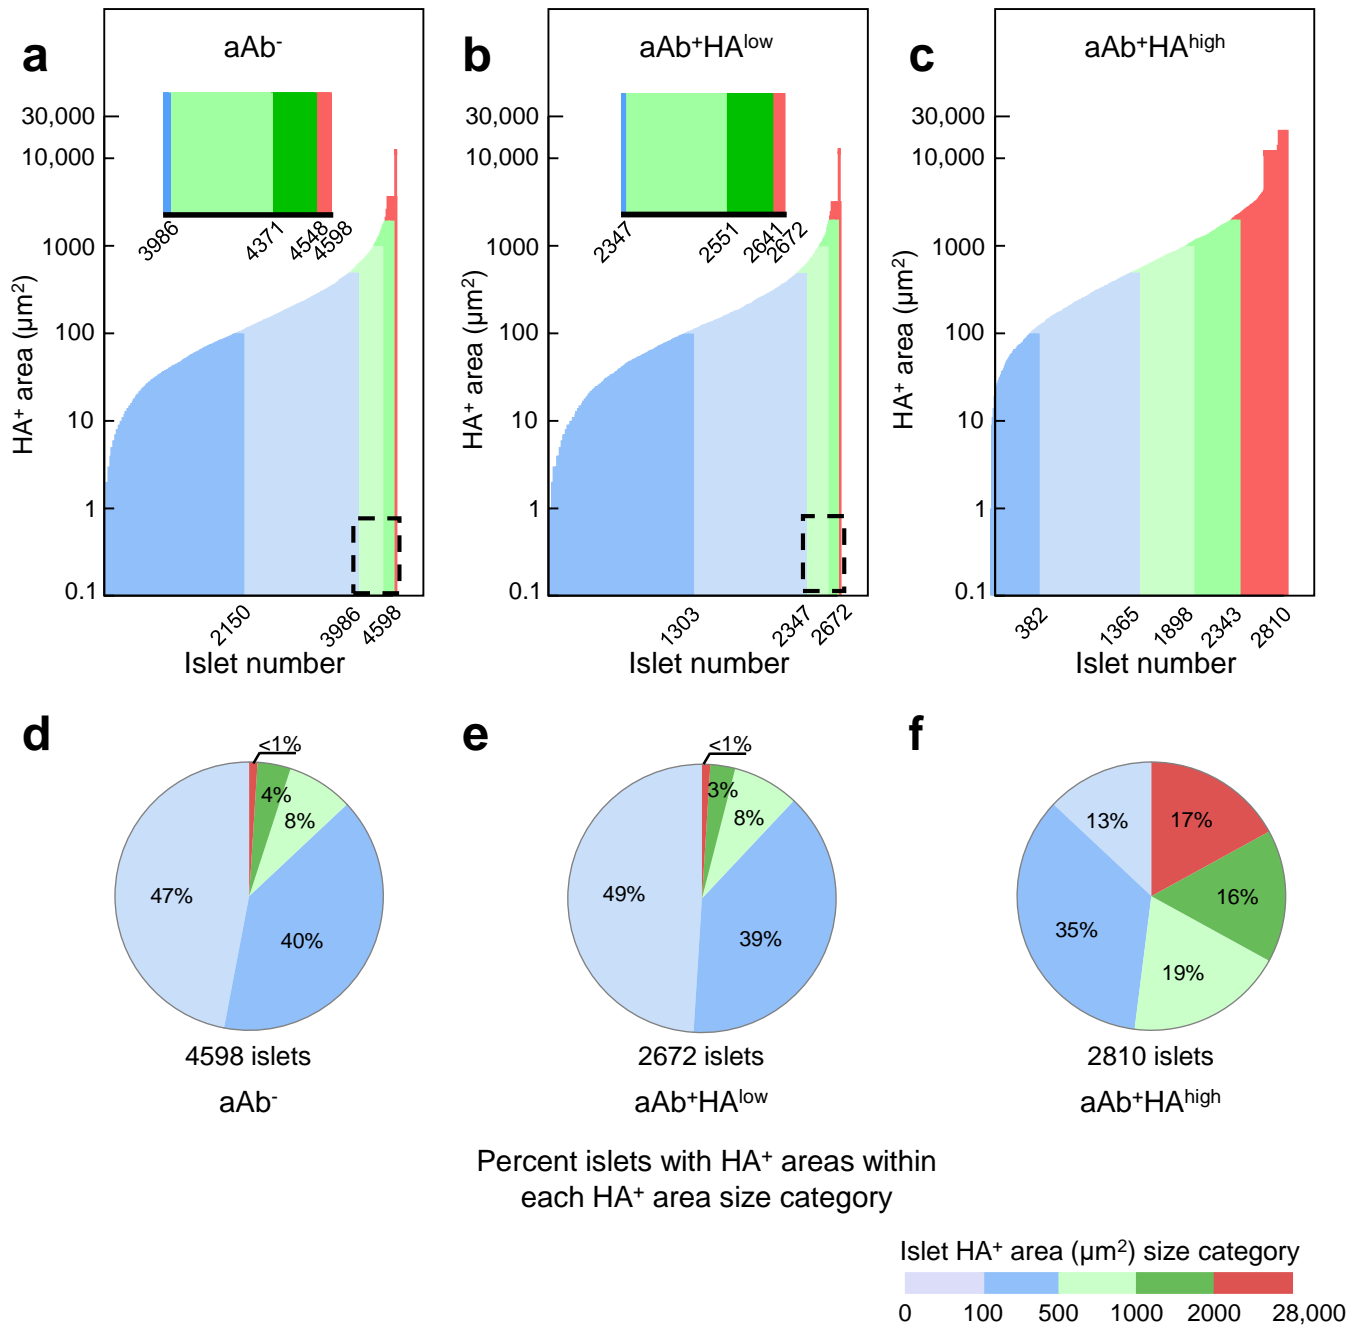

**ESM Fig. 1** HA accumulates in islets in a subset of aAb<sup>+</sup> donors. **(a-c)** Histograms of individual HA<sup>+</sup> areas measured in 4598, 2672, and 2810 islets from control aAb<sup>-</sup>, aAb<sup>+</sup>HA<sup>low</sup>, and aAb<sup>+</sup>HA<sup>high</sup> tissues, respectively. The values of the HA<sup>+</sup> areas for the indicated number of islets are in ascending order. The islet HA<sup>+</sup> areas are shown on a log<sub>10</sub> scale. The numbers on the x-axis indicate the cumulative number of islets. **(a, b)** The cumulative numbers of islets with HA<sup>+</sup> areas within the 500-1000 μm<sup>2</sup>, 1001-2000 μm<sup>2</sup>, or >2000 μm<sup>2</sup> size categories, presented in the light green, dark green, and red bars, respectively, (insets) are shown magnified. **(d-f)** Islet HA<sup>+</sup> area size distribution. *p*<0.0005, one-way ANOVA, aAb<sup>+</sup>HA<sup>high</sup> vs. control or aAb<sup>+</sup>HA<sup>low</sup> tissues.

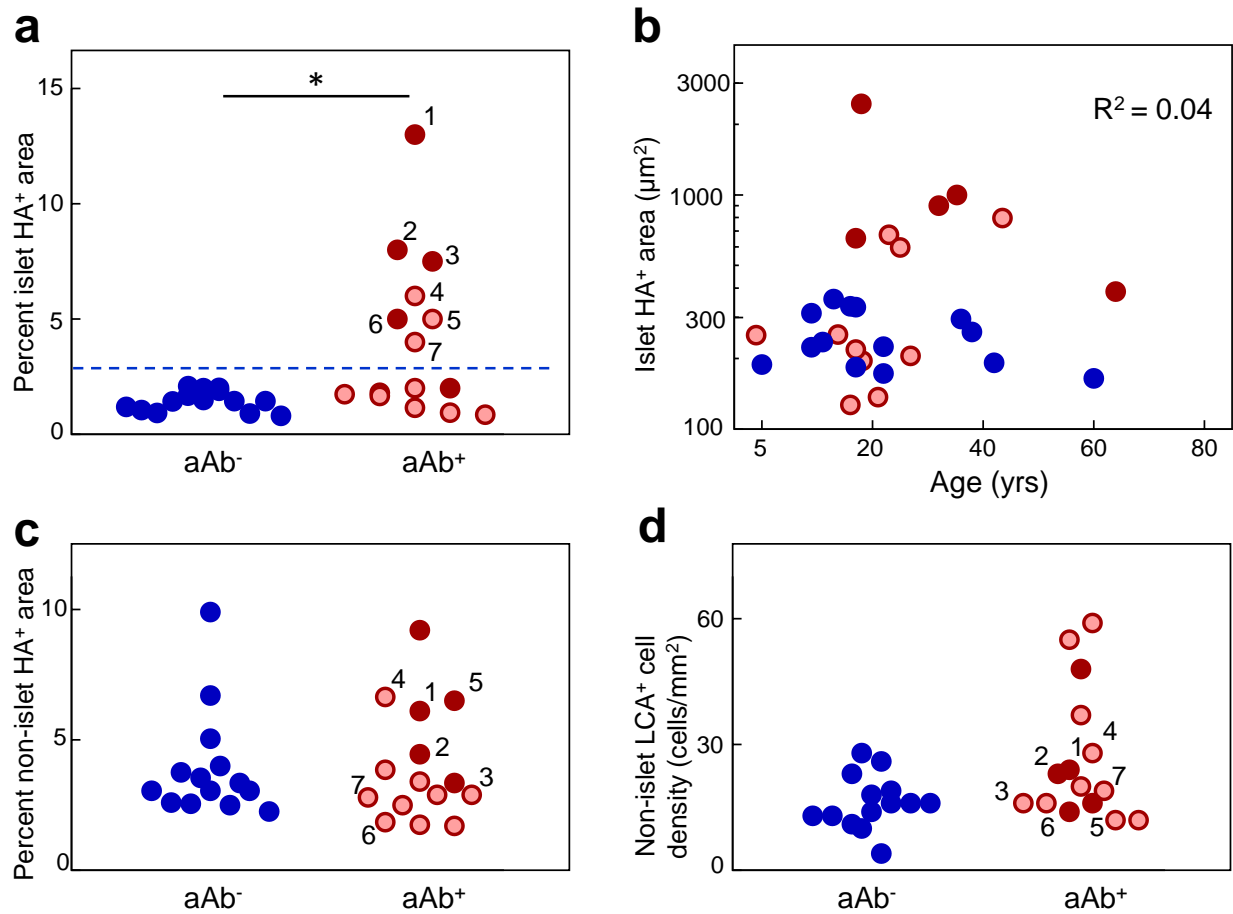

**ESM Fig. 2** (a) Scatter plot of percent islet HA<sup>+</sup> areas. \* $p < 0.0001$ , Mann-Whitney  $U$  test. The dotted line indicates the upper cut-off value (mean + 3SD) of the measurements obtained from the aAb<sup>-</sup> controls. 4598, 2672, and 2810 islets from aAb<sup>-</sup> control, aAb<sup>+</sup>HA<sup>low</sup>, and aAb<sup>+</sup>HA<sup>high</sup> tissues were analyzed, respectively. (b) Islet HA<sup>+</sup> area as a function of donor age. HA<sup>+</sup> areas (c) and LCA<sup>+</sup> cell density (d) in the non-islet region. Each circle denotes an individual donor. The islet HA<sup>+</sup> areas are shown on a log<sub>10</sub> scale. Blue circles, aAb<sup>-</sup> donors; light red circles, single-aAb<sup>+</sup>; dark red circles, double-aAb<sup>+</sup>.

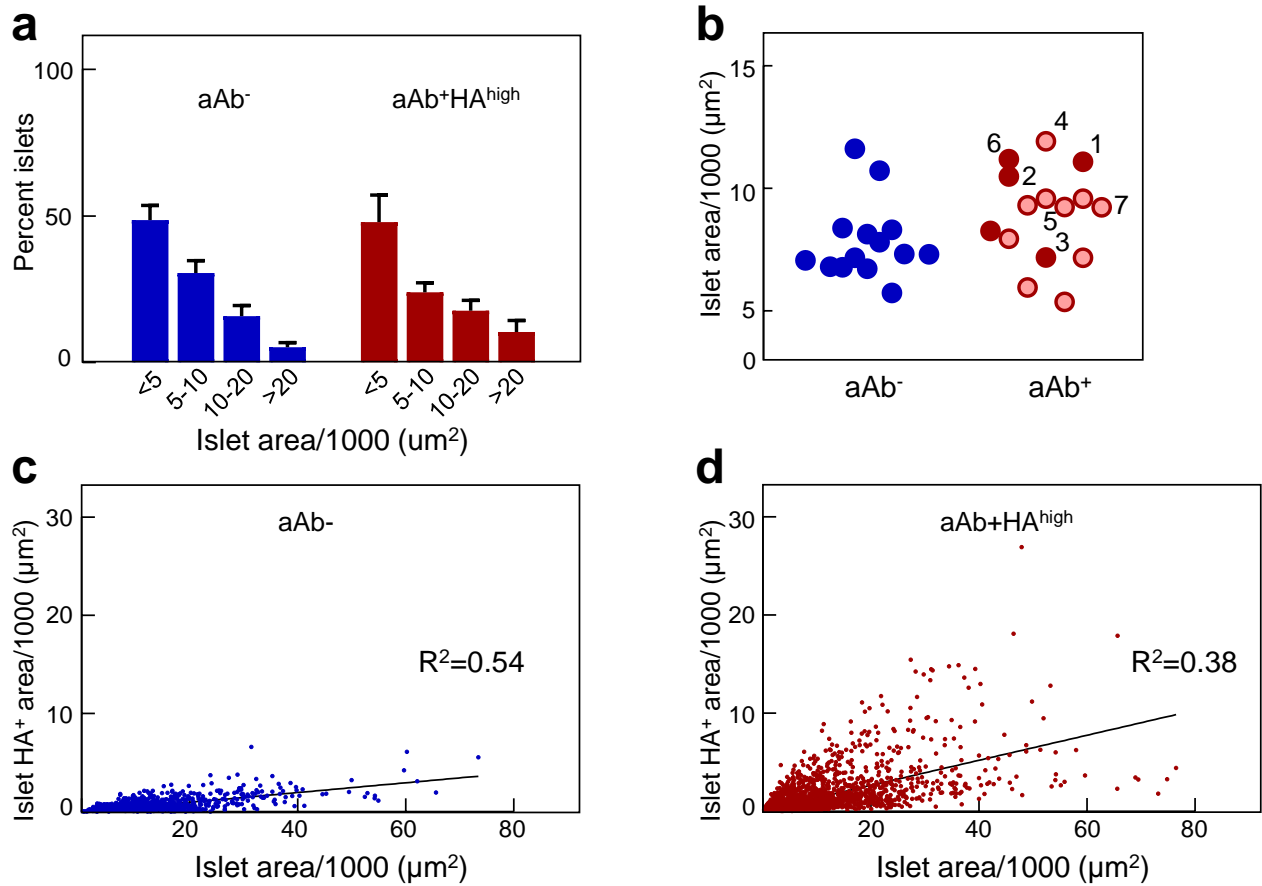

**ESM Fig. 3** (a) Islet size distribution in 14 aAb<sup>-</sup> and 7 aAb<sup>+</sup>HA<sup>high</sup> tissues. (b) Islet areas in each individual tissue. Islet HA<sup>+</sup> area as a function of islet area in 14 aAb<sup>-</sup> (c) and 7 aAb<sup>+</sup>HA<sup>high</sup> (d) tissues. Each circle denotes an individual donor in (b) and an individual islet in (c and d). Blue bars and circles, aAb<sup>-</sup> donors; light red circles, single-aAb<sup>+</sup>; dark red bars, aAb<sup>+</sup>; dark red circles, double-aAb<sup>+</sup> in (b) and aAb<sup>+</sup>HA<sup>high</sup> in (d).

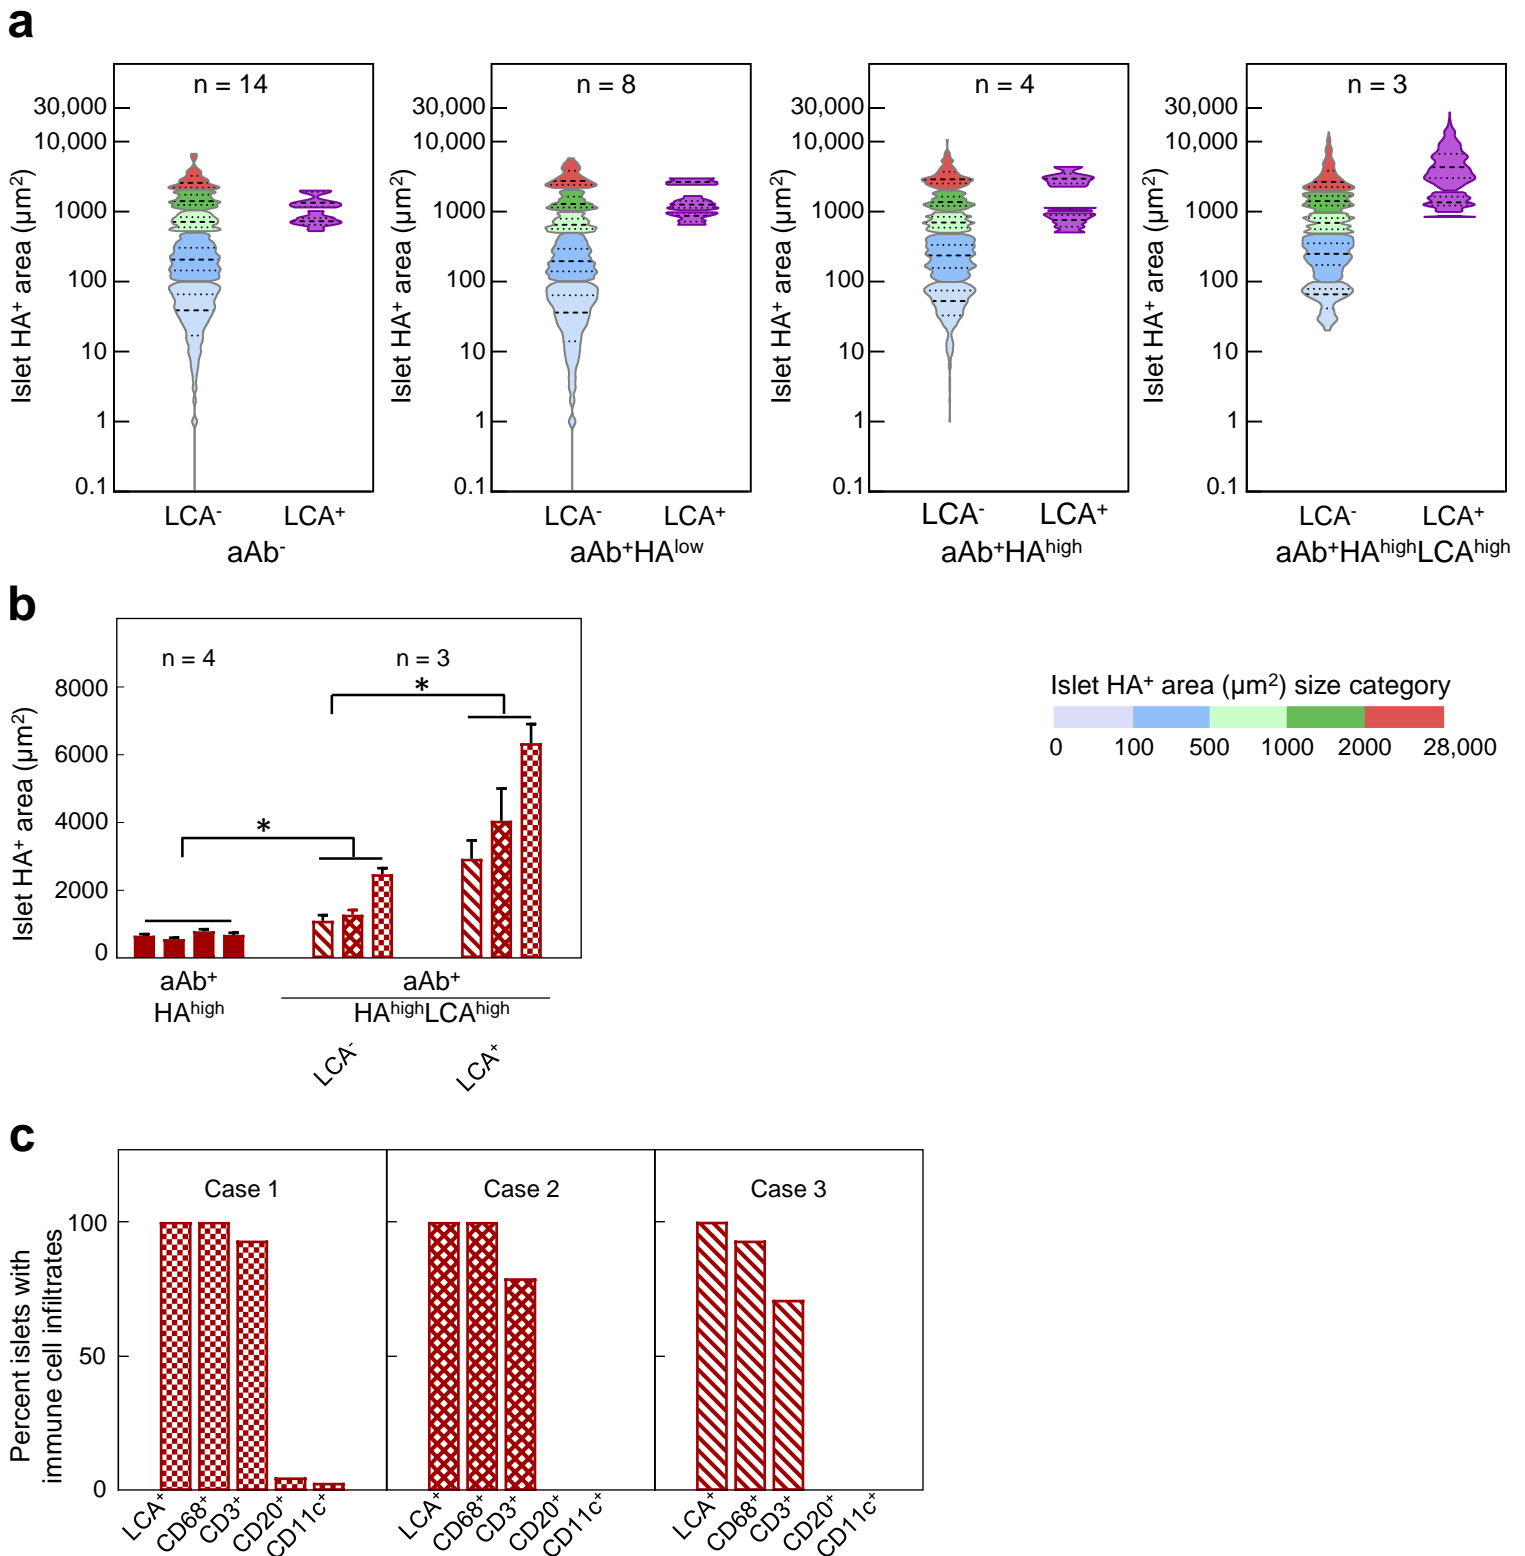

**ESM Fig. 4** LCA<sup>+</sup> leukocytes infiltrate islets exclusively in regions containing the largest HA deposits.

(a) Violin plots of HA<sup>+</sup> areas in islets without (LCA<sup>-</sup>) or with (LCA<sup>+</sup>) immune cells distributed within each HA area size category. The islet HA<sup>+</sup> areas are shown on a log<sub>10</sub> scale. (b) Islet HA<sup>+</sup> areas in the 7 individual aAb<sup>+</sup>HA<sup>high</sup> tissues. Each bar represents one tissue. Solid bars, 4 aAb<sup>+</sup>HA<sup>high</sup> tissues which showed no evidence of insulinitis; hatched bars, 3 aAb<sup>+</sup>HA<sup>high</sup> tissues with insulinitis. In the 3 aAb<sup>+</sup>HA<sup>high</sup>LCA<sup>high</sup> tissues, immune cell-free islets (LCA<sup>-</sup>) and islets with associated immune cells (LCA<sup>+</sup>) are assessed separately. Data are mean  $\pm$  SEM of the measurements. \* $p < 0.001$ , Mann-Whitney  $U$  test. (c) Proportion of islets with LCA<sup>+</sup> cell infiltrates containing CD68<sup>+</sup>, CD3<sup>+</sup>, CD20<sup>+</sup>, and CD11c<sup>+</sup> cells.



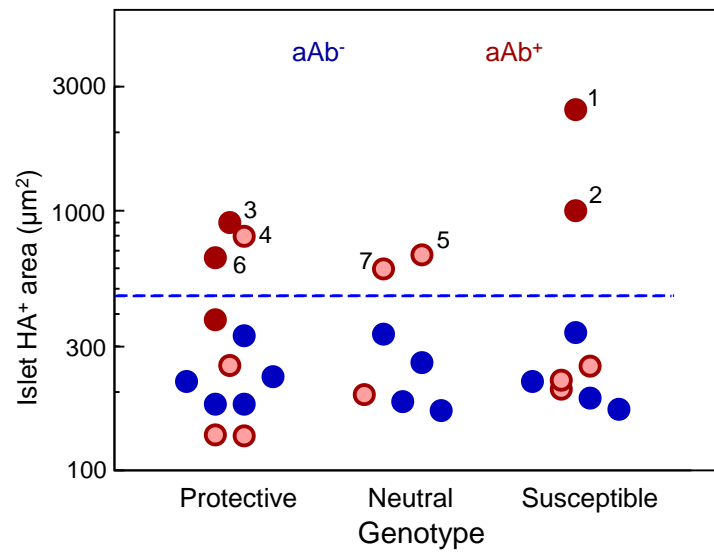

**ESM Fig. 5** Scatter plot of islet HA<sup>+</sup> areas as a function of donor HLA genotypes associated with type 1 diabetes. Each circle denotes an individual donor. The islet HA<sup>+</sup> areas are shown on a log<sub>10</sub> scale. Blue circles, aAb<sup>-</sup> donors; light red circles, single-aAb<sup>+</sup>; dark red circles, double-aAb<sup>+</sup>. Data are mean values of HA<sup>+</sup> areas for each individual donor. The dotted line indicates the upper cut-off value (mean + 3SD) of the measurements obtained from the aAb<sup>-</sup> controls. The numbers 1-7 indicate the aAb<sup>+</sup>HA<sup>high</sup> tissues ranked according to the size of their islet HA<sup>+</sup> areas.

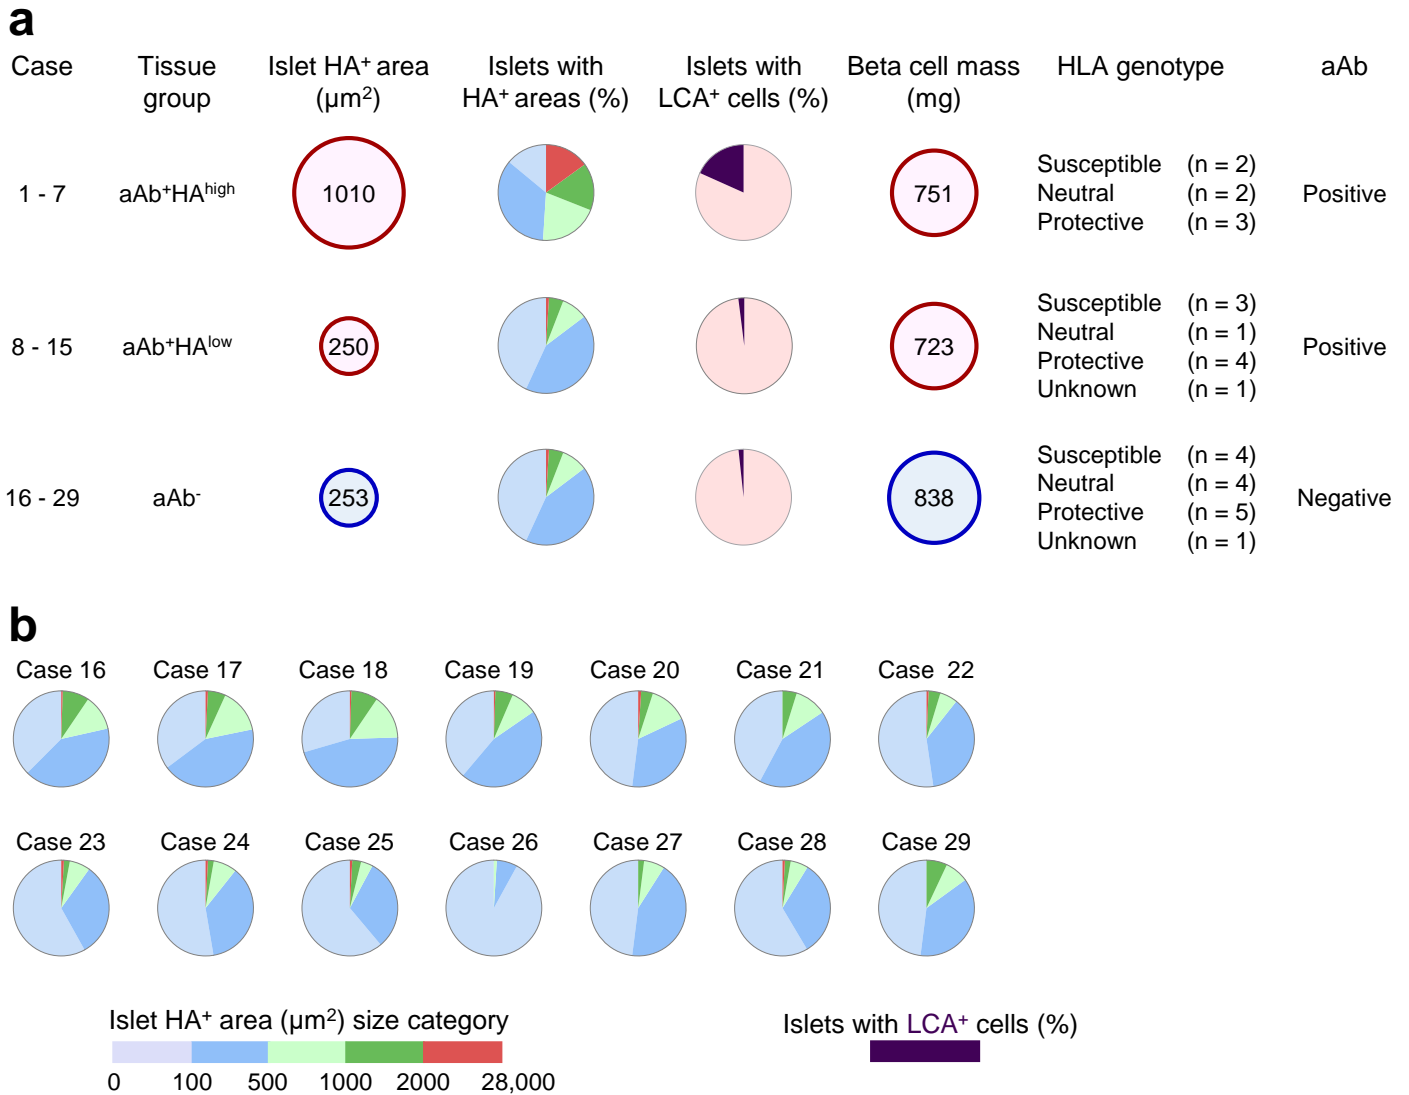

**ESM Fig. 6 (a)** Islet HA<sup>+</sup> areas, insulinitis, and beta cell mass in tissues from all donors. Data are mean values of measurements made in the 7 aAb<sup>+</sup>HA<sup>high</sup>, 8 aAb<sup>+</sup>HA<sup>low</sup>, and 14 control aAb<sup>-</sup> tissues. The pie charts represent the mean percentage of islets with HA<sup>+</sup> areas falling within each of the HA<sup>+</sup> areas size categories or the percentage of islets with LCA<sup>+</sup> cells. The size of the red or blue circles is proportional to the average size of the islet HA<sup>+</sup> areas or beta cell mass, which is indicated by the value number within the circle. The measurements made in islets from the individual aAb<sup>+</sup> donors are shown in Fig. 6. In the tissues from the 14 aAb<sup>-</sup> donors: Size range of islet HA<sup>+</sup> areas, 172 to 375 μm<sup>2</sup>; range of proportion of islets with HA<sup>+</sup> areas, 38 to 59% for ≤100 μm<sup>2</sup>, 31 to 52% for 101-500 μm<sup>2</sup>, 3 to 13% for 501-1000 μm<sup>2</sup>, 2 to 8% for 1001-2000 μm<sup>2</sup>, and 0 to <1% for >2000 μm<sup>2</sup>; range of beta cell mass, 390 mg to 1350 mg. **(b)** Islet HA<sup>+</sup> area size distribution in the aAb<sup>-</sup> control group. The pie charts represent the percentage of islets with HA<sup>+</sup> areas falling within each of the HA<sup>+</sup> area size categories.

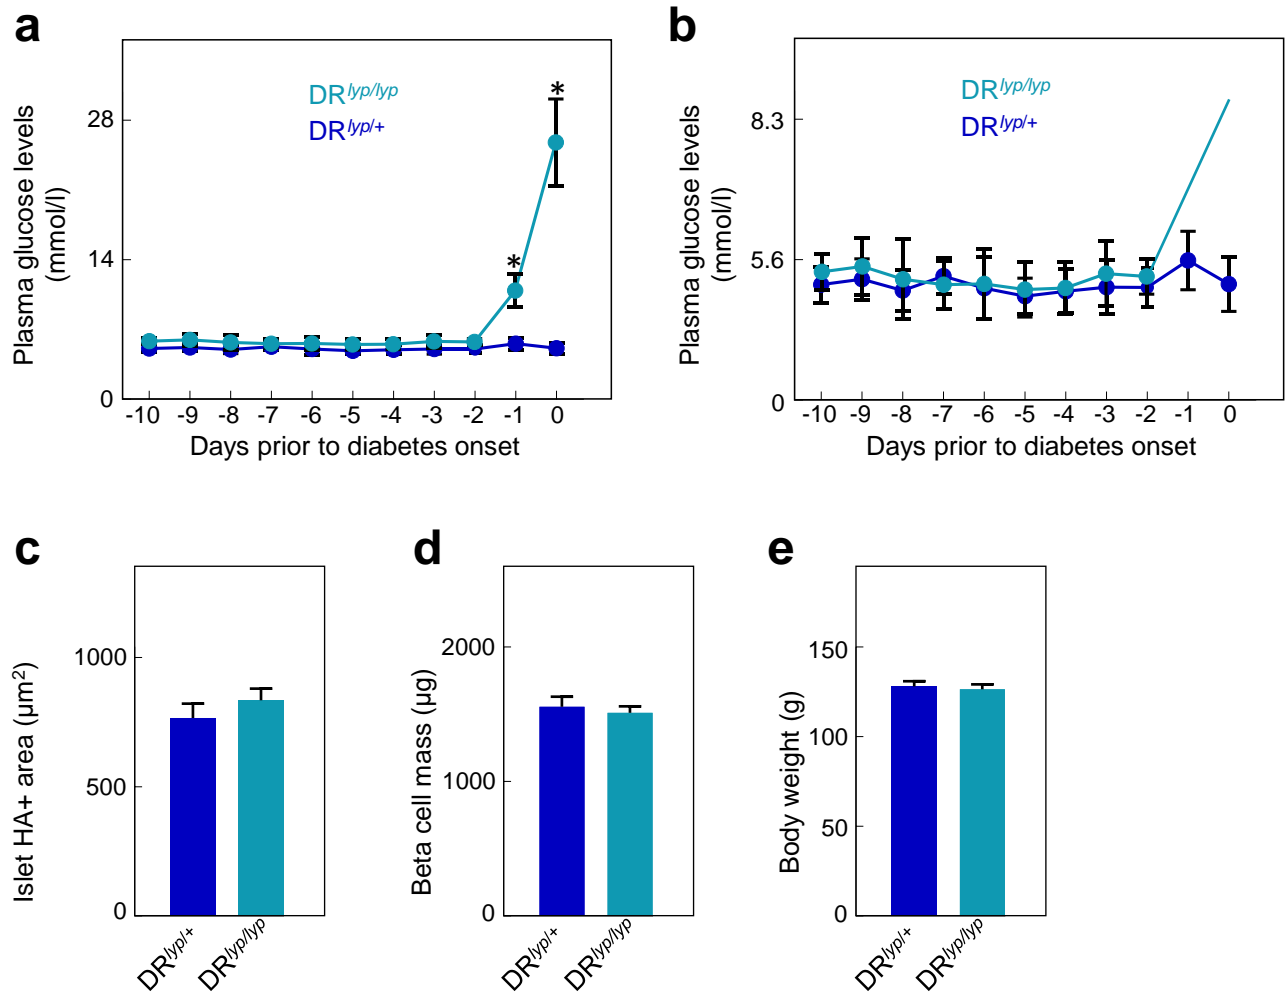

**ESM Fig. 7** Assessment of morphologic and metabolic parameters in BB rats. **(a)** Fed blood glucose levels in diabetes-resistant DR<sup>lyp/+</sup> and diabetes-prone DR<sup>lyp/lyp</sup> rats. Data are mean ± SD of measurements from 10-20 rats. \**p*<0.001, vs previous time point; Kruskal-Wallis test. **(b)** The blood glucose values in the two groups before the onset of hyperglycemia in the DR<sup>lyp/lyp</sup> rats are shown using smaller intervals on the y-axis. **(c)** Islet HA+ areas, **(d)** beta cell mass, and **(e)** body weight in DR<sup>lyp/+</sup> (blue bars) and DR<sup>lyp/lyp</sup> (light blue bars) rats at 6 weeks of age. Data are mean ± SD of individual measurements obtained from 20 rats in each group.

**a**

|                                                     | DR <i>Lyp</i> + | DR <i>Lyp</i> / <i>lyp</i> |
|-----------------------------------------------------|-----------------|----------------------------|----------------------------|----------------------------|----------------------------|
| Age (weeks)                                         | 6 - 12          | 7 - 8                      | 9 - 10                     | 10 - 11                    | 11 - 12                    |
| Intra-islet HA <sup>+</sup> area (μm <sup>2</sup> ) | 470             | 1030                       | 2390                       | 4110                       | 2950                       |
| Peri-islet HA <sup>+</sup> area (μm <sup>2</sup> )  | 540             | 1340                       | 1990                       | 3110                       | 2440                       |
| Insulinitis grade                                   | 0               | 0                          | 1                          | 2                          | 3                          |

**b**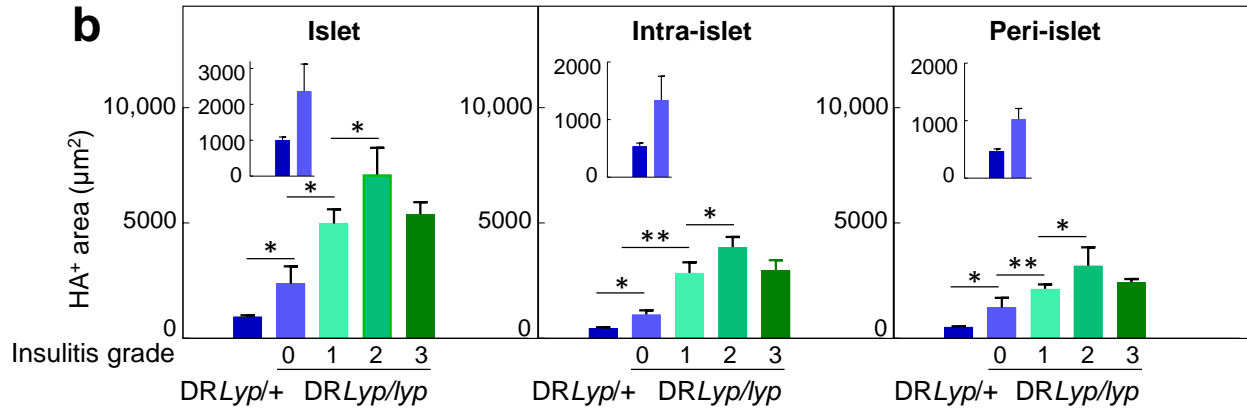**c**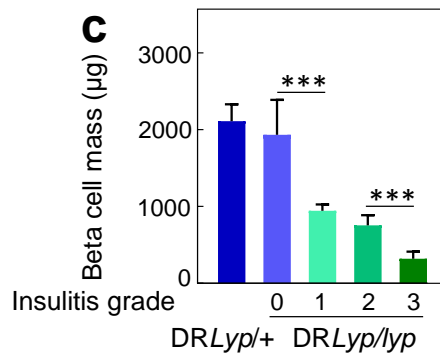**d**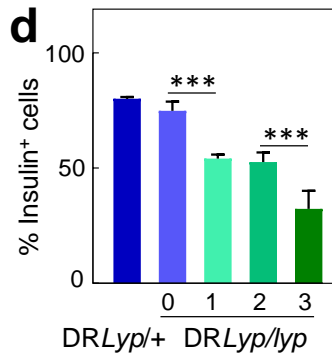**e**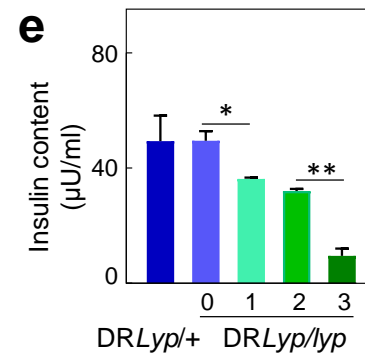**f**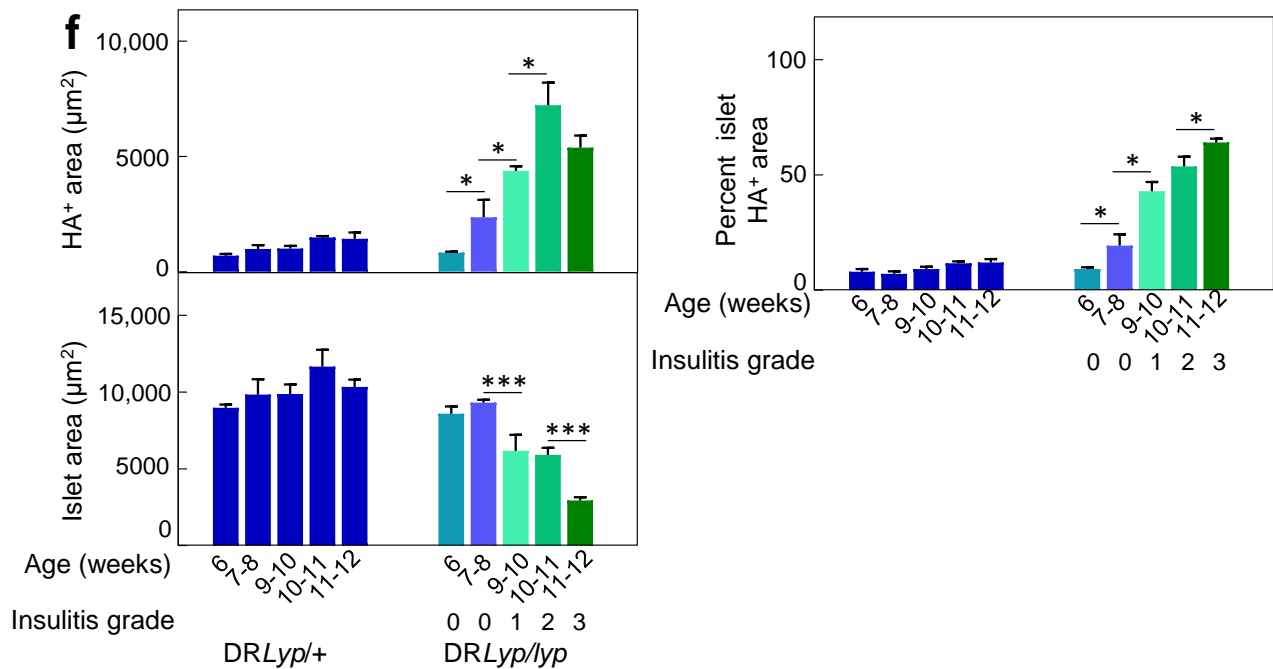

**ESM Fig. 8** HA accumulates in islets while beta cell mass decreases in presymptomatic *DRLyp/lyp* rats during the progression to hyperglycemia. **(a)** Intra- and peri-islet HA+ areas in diabetes-resistant *DRLyp/+* (blue circles) or diabetes-prone *DRLyp/lyp* (light blue and green circles) rats exhibiting different degrees of insulinitis. Data are the mean values of measurements obtained from 300-400 islets (5-6 rats) per group. The size of each circle is proportional to the average size of the HA+ areas which is indicated by the value number within the circle. **(b)** Islet, intra- and peri-islet HA+ areas in tissues from *DRLyp/+* (blue bars) or *DRLyp/lyp* (light blue and green bars) rats. Left panel, data represent mean  $\pm$  SEM of the measurements shown in Fig. 7k; middle and right panels, mean  $\pm$  SEM of the measurements shown in **(a)** of this figure. **(c)** Beta cell mass, **(d)** percentage of insulin+ cells, and **(e)** pancreas insulin content in *DRLyp/+* and *DRLyp/lyp* rats. **(f)** Islet HA areas and islet areas in *DRLyp/+* and *DRLyp/lyp* rats. Data are mean  $\pm$  SEM of the measurements obtained from 5-6 rats per group. \* $p < 0.05$ , \*\* $p < 0.01$ , \*\*\* $p < 0.001$  as indicated, Mann-Whitney *U* test.
